# Supplementary material for: Non-Ignorable Differences in NIRv-Based Estimations of Gross Primary Productivity Considering Land Cover Change and Discrepancies in Multisource Products
Source: MDPI journal article supplement (doi:10.3390/rs15194693), 2023-09-25
Supplement: s1 [file s1]

# Non-Ignorable Differences in NIRv-Based Estimations of Gross Primary Productivity Considering Land Cover Change and Discrepancies in Multisource Products

Jiaxin Jin <sup>1,2</sup>, Weiye Hou <sup>1</sup>, Longhao Wang <sup>1,3,\*</sup>, Songhan Wang <sup>4,5</sup>, Ying Wang <sup>6</sup>, Qiuhan Zhu <sup>1</sup>, Xiuqin Fang <sup>1</sup> and Liliang Ren <sup>1</sup>

<sup>1</sup> College of Hydrology and Water Resources, Hohai University, Nanjing 210024, China; [jiaxinking@hhu.edu.cn](mailto:jiaxinking@hhu.edu.cn) (J.J.); [houlweiy@hhu.edu.cn](mailto:houlweiy@hhu.edu.cn) (W.H.); [zhuq@hhu.edu.cn](mailto:zhuq@hhu.edu.cn) (Q.Z.); [kinkinfang@hhu.edu.cn](mailto:kinkinfang@hhu.edu.cn) (X.F.); [rl@hhu.edu.cn](mailto:rl@hhu.edu.cn) (L.R.)

<sup>2</sup> Key Laboratory of Water Big Data Technology of Ministry of Water Resources, Hohai University, Nanjing 210024, China;

<sup>3</sup> Key Laboratory of Water Cycle and Related Land Surface Processes, Institute of Geographic Sciences and Natural Resources Research, Chinese Academy of Sciences, Beijing 100101, China; [wanglonghao0857@igsrr.ac.cn](mailto:wanglonghao0857@igsrr.ac.cn) (L.W.)

<sup>4</sup> Key Laboratory of Urban Land Resources Monitoring and Simulation, Ministry of Natural Resources, Jiangsu Collaborative Innovation Center for Modern Crop Production, College of Agriculture, Nanjing Agricultural University, Nanjing 210095, China; [wangsonghan@njau.edu.cn](mailto:wangsonghan@njau.edu.cn)

<sup>5</sup> Key Laboratory of Crop Physiology and Ecology in Southern China, College of Agriculture, Nanjing Agricultural University, Nanjing 210095, China

<sup>6</sup> Tourism and Social Administration College, Nanjing Xiaozhuang University, Nanjing 211171, China; [mfacewang@njxzc.edu.cn](mailto:mfacewang@njxzc.edu.cn) (Y.W.)

\* Correspondence: [wanglonghao0857@igsrr.ac.cn](mailto:wanglonghao0857@igsrr.ac.cn); Tel.: +86-10-64856515

## List of supporting materials

- Text S1. Comparison between the site EC data and the experimental results.
- Table S1. Details of the three EC flux towers (CN-HaM, CF-HBG\_S01, and CN-Ha2) in the Yellow River Basin employed in this study. Note that GRA refers to grassland and SHR refers to shrubland.
- Figure S1. Geographical location of the three EC flux towers (CN-HaM, CF-HBG\_S01, and CN-Ha2) in the Yellow River Basin employed in this study.
- Figure S2. Scatter plots between the observed EC GPP against MODIS monthly static and dynamic schemes. The blue orange and green points represent CN-Ha2, CN-HaM and CF-HBG\_S01 site, respectively.

### Text S1. Comparison between the site EC data and the experimental results

We collated eddy-covariance (EC) observed daily gross primary productivity (GPP) as the field observations to investigate the outperformance of our results. The CN-HaM and CN-Ha2 were obtained from the FLUXNET2015<sup>[1]</sup> and the CF-HBG\_S01 was obtained from the ChinaFLUX<sup>[2]</sup>. The geographical locations and details of the three EC flux towers were shown in Figure S1 and Table S1, respectively.

The employment of the EC month observed GPP data supported the comprehensive validation of our method. The simulation GPP was extracted in light of the central location of the EC site and the surrounding eight pixels. The RMSE value based on the static scheme is 141.197 gCm<sup>-2</sup>month<sup>-1</sup>. The RMSE value based on the dynamic scheme decreased by 37% against that based on the static scheme.

**Table S1. Details of the three EC flux towers (CN-HaM, CF-HBG\_S01, and CN-Ha2) in the Yellow River Basin employed in this study. Note that GRA refers to grassland and SHR refers to shrubland.**

| Site code  | Site name                     | IGBP | Latitude | Longitude | Time scale              | Reference          |
|------------|-------------------------------|------|----------|-----------|-------------------------|--------------------|
| CF-HBG_S01 | Chinaflux Haibei<br>grassland | GRA  | 37.6653  | 101.3311  | 2003-2005;<br>2008-2010 | Yu et al. (2021)   |
| CN-HaM     | Haibei Alpine<br>Tibet site   | GRA  | 37.6975  | 101.2733  | 2002-2004               | Kato et al. (2006) |
| CN-Ha2     | Haibei Shrubland              | SHR  | 37.6086  | 101.3269  | 2003-2005               | Li et al. (2016)   |

43

44

45

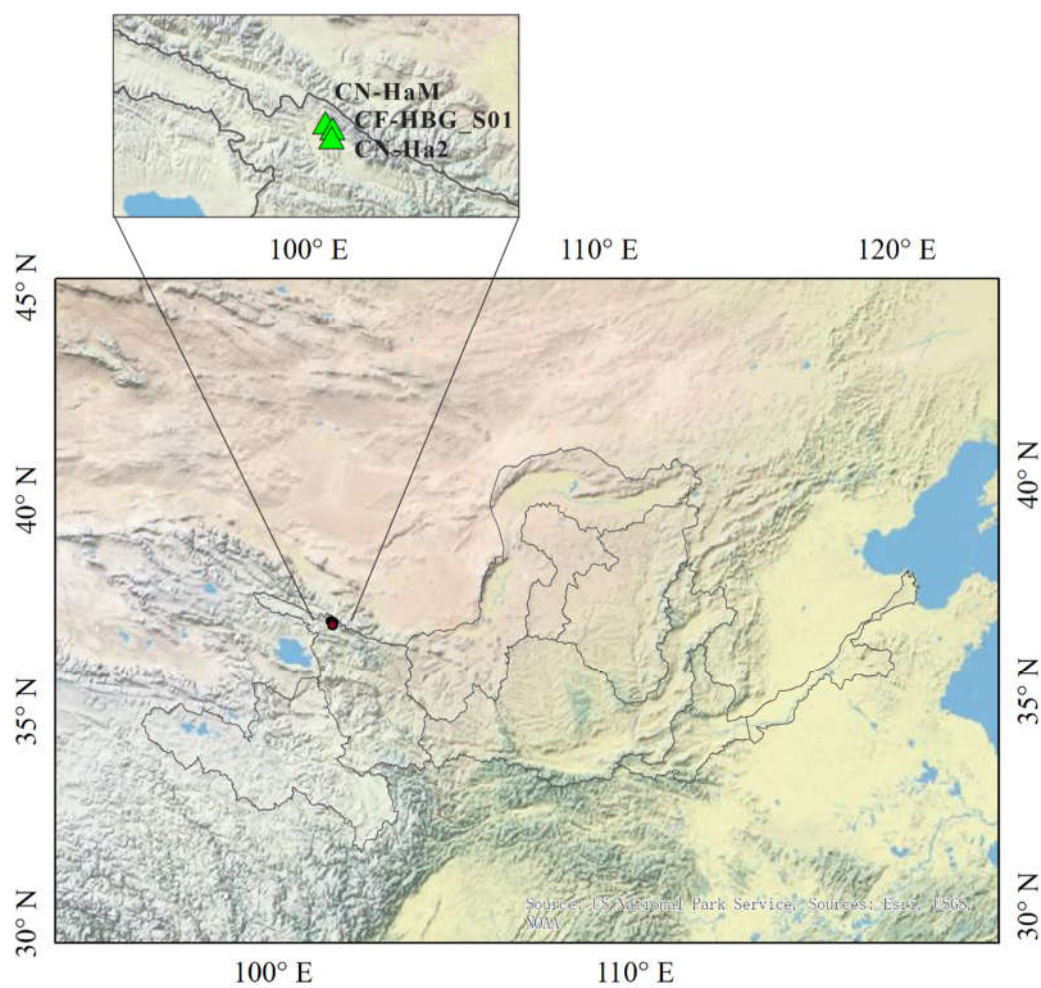

Figure S1. Geographical location of the three EC flux towers (CN-HaM, CF-HBG\_S01, and CN-Ha2) in the Yellow River Basin employed in this study.

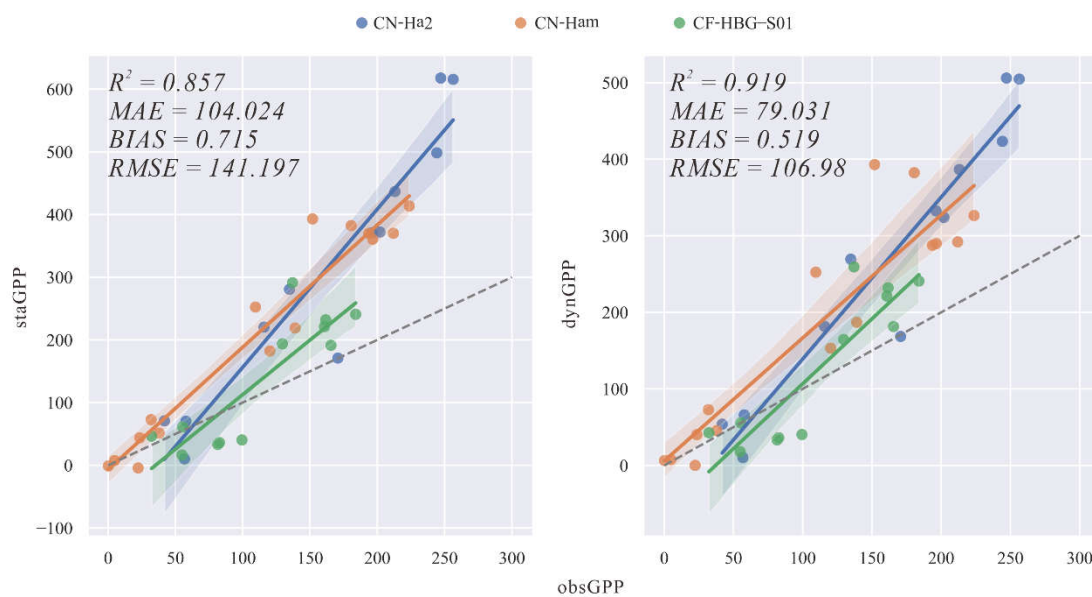

Figure S2. Scatter plots between the observed EC GPP against MODIS monthly static and dynamic schemes. The blue orange and green points represent CN-Ha2, CN-Ham and CF-HBG\_S01 site, respectively.

49

50

51

## References

1. Pastorello, G.; Trotta, C.; Canfora, E.; Chu, H.S.; Christianson, D.; Cheah, Y.W.; Poindexter, C.; Chen, J.Q.; Elbashandy, A.; Humphrey, M.; et al. The FLUXNET2015 dataset and the ONEFlux processing pipeline for eddy covariance data. *Sci. Data* **2010**, *7*, 225. <https://doi.org/10.1038/s41597-020-0534-3>
2. Yu, H.; Qi, D.H.; Zhang, Y.P.; Song, Q.H.; Fei, X.H.; Sha, L.Q.; Liu, Y.T.; Zhou, W.J.; Zhou, L.G.; Deng, X.B.; et al. An observation dataset of carbon and water fluxes in Xishuangbanna rubber plantations from 2010 to 2014. *Sci. Data Bank* **2021**, *6*, 92–103. <https://doi.org/10.11922/sciencedb.j00001.00123>
3. Kato, T.; Tang, Y.; Gu, S.; Hirota, M.; Du, M.; Li, Y.; Zhao, X.Q. Temperature and biomass influences on interannual changes in CO<sub>2</sub> exchange in an alpine meadow on the Qinghai-Tibetan Plateau. *Glob Chang Biol.* **2006**, *12*, 1285–1298. <https://doi.org/10.1111/j.1365-2486.2006.01153.x>
4. Li, Y.N. (2003–2005) FLUXNET2015 CN-Ha2 Haibei Shrubland. *Dataset* **2016**. <https://doi.org/10.18140/FLX/1440211>
