# Supplementary material for: Non-Ignorable Differences in NIRv-Based Estimations of Gross Primary Productivity Considering Land Cover Change and Discrepancies in Multisource Products
Source: MDPI journal article supplement (doi:10.3390/rs15194693), 2023-09-25
Supplement: s1 [file s1]

Archive with 1 entries (1 files):
- remotesensing-2582795-supplementary.pdf
